# Supplementary material for: In situ architecture of the algal nuclear pore complex
Source: PubMed Central journal article supplement (PMC6006428; doi:10.1038/s41467-018-04739-y), 2018-06-18
Supplement: 41467_2018_4739_MOESM3_ESM.pdf [file 41467_2018_4739_MOESM3_ESM.pdf]

## Description of Additional Supplementary Files

**File Name:** Supplementary Movie 1

**Description:** Fit of the 24 Y-complexes (outer: orange, inner: light blue) into the CrNPC cryo-EM density map. Accompanies Fig. 3a.

**File Name:** Supplementary Data 1

**Description:** Individual expression estimates of the components of NPC, COP I, COP II and Clathrin, in Fragments Per Kilobase of transcripts per million mapped reads (FPKM).
